# Supplementary material for: Radiation exposure induces cross-species temporal metabolic changes that are mitigated in mice by amifostine
Source: PubMed Central journal article supplement (PMC8263605; doi:10.1038/s41598-021-93401-7), 2021-07-07
Supplement: 41598_2021_93401_MOESM1_ESM.pdf [file 41598_2021_93401_MOESM1_ESM.pdf]

**Supplemental Information for**  
**Radiation Exposure Induces Cross-Species Temporal Metabolic Changes that**  
**are Mitigated in Mice by Amifostine**

Alexandra Crook,<sup>1,†</sup> Aline De Lima Leite,<sup>2,†</sup> Thomas Payne,<sup>2,†</sup> Fatema Bhinderwala,<sup>1,2</sup> Jade Woods,<sup>1</sup> Vijay K. Singh,<sup>3,4,\*</sup> Robert Powers<sup>1,2,\*</sup>

<sup>1</sup>*Department of Chemistry, University of Nebraska-Lincoln, Lincoln NE 68588*

<sup>2</sup>*Nebraska Center for Integrated Biomolecular Communication, University of Nebraska-Lincoln, Lincoln NE 68588*

<sup>3</sup>*Department of Pharmacology and Molecular Therapeutics, F. Edward Hébert School of Medicine, USUHS, Bethesda, MD 20814, USA*

<sup>4</sup>*Armed Forces Radiobiology Research Institute, USUHS, Bethesda, MD 20814, USA*

†equal contribution

\*To whom correspondence should be addressed:

Robert Powers  
University of Nebraska-Lincoln  
Department of Chemistry  
722 Hamilton Hall  
Lincoln, NE 68588-0304

Email: [rpowers3@unl.edu](mailto:rpowers3@unl.edu)  
Phone: (402) 472-3039  
Fax: (402) 472-9402

Vijay K. Singh  
Department of Pharmacology and Molecular  
Therapeutics  
F. Edward Hébert School of Medicine, USUHS  
4301 Jones Bridge Road, Bethesda, MD 20814

Email: [vijay.singh@usuhs.edu](mailto:vijay.singh@usuhs.edu)  
Phone: 301-295-2347  
Fax: 301-295-6503

Statistical Analyses:

Thomas Payne  
Email: 447999157376  
Phone: [paynet@hotmail.co.uk](mailto:paynet@hotmail.co.uk)

## Contents

### Materials and Methods

- Chemicals
- Preparation of blood and serum samples for metabolomics analysis
- NMR data collection and processing
- LC-MS data collection and processing
- NMR and MS data analyses

### Figures

**Figure S1.** Univariate Analysis of Cohort 1.

**Figure S2.** Univariate Analysis of Cohort 2.

**Figure S3.** Univariate Analysis of Cohort 3.

**Figure S4.** Heatmap and Pathway Enrichment of Cohort 3.

**Figure S5.** NMR and MS Metabolomics Trajectories of Amifostine Treatment.

### Tables

**Table S1.** Perturbed Metabolites of Cohort 1

**Table S2.** Perturbed Pathways of Cohort 1.

**Table S3.** Perturbed Metabolites of Cohort 2

**Table S4.** Perturbed Pathways of Cohort 2.

**Table S5.** Perturbed Metabolites in Cohort 3 RAD D1vD5

**Table S6.** Perturbed Pathways of Cohort 3 RAD D1vD5.

**Table S7.** Perturbed Metabolites of Cohort 3 RAD+200 D5vD9.

**Table S8.** Perturbed Pathways of Cohort 3 RAD+200 D5vD9.

## **Materials and Methods**

### **Chemicals**

All chemicals were obtained from Sigma Aldrich (Milwaukee, WI) unless otherwise denoted. 3-(trimethylsilyl) propionic-2,2,3,3-D<sub>4</sub> acid sodium salt (98% D, TMSP) was purchased from Cambridge Isotopes (Andover, MA). Potassium phosphate dibasic salt (anhydrous, 99.1% pure) and monobasic salt (crystal, 99.8% pure) were purchased from Fisher Scientific (Fair Lawn, NJ).

### **Preparation of blood and serum samples for metabolomics analysis**

Mouse (n=236) and NHP (n=70) serum samples, and mouse blood samples (n=300) were simultaneously prepared for LC-MS and NMR analysis as shown in **Figure 1C**. The preparation of blood samples were optimized from a previously published protocol.<sup>(1)</sup> 2.0% by volume of NaN<sub>3</sub> was added to each serum or blood sample to avoid bacterial growth. The protein component was precipitated by adding 100  $\mu$ L (2x) of methanol to 50  $\mu$ L of serum or blood. Deoxygenated methanol was used for the blood preparation to avoid unnecessary oxidation of the red blood cells. An increase in metabolite levels extracted from blood samples was previously observed with deoxygenated methanol.<sup>(1)</sup> Methanol was purged of oxygen by bubbling in nitrogen gas for 30 minutes.

The 1:2 mixtures were then vortexed for 10 seconds. Serum samples were incubated at room temperature for 5 min. Blood samples were sonicated in a water bath for 10 minutes at 4 °C, followed by incubation at -20 °C for 20 min. The samples were then centrifuged at 15,000 x *g* for 20 min at 4 °C to pellet the proteins. The supernatant was collected, transferred to an Eppendorf tube, and centrifuged again at 15,000 x *g* for 5 min at 4 °C. The supernatant was then divided 20%

and 80% for LC-MS and NMR samples, respectively. Samples were snap-frozen in liquid nitrogen. Methanol was evaporated by speed vacuum centrifugation (SpeedVac R Plus, Savant) and water was removed by lyophilization using FreeZone™ (Labconco, Kansas City, MO).

### **NMR data collection and processing**

Dried serum or blood samples were reconstituted using 50  $\mu$ L of 50 mM phosphate buffer in 100% D<sub>2</sub>O at pH 7.2 (uncorrected) with 50  $\mu$ M TMS<sup>+</sup> as an NMR chemical shift reference and internal standard. The samples were centrifuged at 15,000  $\times g$  for 20 min at 4 °C to remove any particulates, and the supernatant was transferred to 1.7 mm NMR tube for data acquisition. All NMR experiments were collected at 298K with a Bruker AVANCE III HD 700 MHz spectrometer equipped with a 5 mm quadruple resonance QCI-P cryoprobe (<sup>1</sup>H, <sup>13</sup>C, <sup>15</sup>N and <sup>31</sup>P) with z-axis gradients. A SampleJet automated sample changer with Bruker ICON-NMR software was used to collect all data.

A one-dimensional (1D) <sup>1</sup>H NMR spectrum was collected for each sample. 1D <sup>1</sup>H NMR spectra were collected with 32K data points, a spectrum width of 8417.5 Hz, 256 scans, and 4 dummy scans using an excitation sculpting pulse sequence to remove the solvent peak.(2) In addition, a natural abundance 2D <sup>1</sup>H-<sup>13</sup>C HSQC spectrum was collected for representatives from each group. The 2D <sup>1</sup>H-<sup>13</sup>C HSQC spectra were collected with 64 scans, 16 dummy scans, and a 2 s relaxation delay. The spectra were collected with 2K data points and a spectrum width of 11160 Hz in the direct dimension, and 1024 data points and a spectrum width of 29052 Hz in the indirect dimension. The 2D <sup>1</sup>H-<sup>13</sup>C HSQC spectra were collected with 25% sparsity using our deterministic non-uniform sampling (NUS) schedule.(3)

The 2D  $^1\text{H}$ - $^{13}\text{C}$  HSQC NUS spectra were reconstructed with the MDD algorithm.(4) Both 1D and 2D NMR spectra were processed using NMRPipe(5) or with our MVAPACK(6) software toolkit (<http://bionmr.unl.edu/mvapack.php>). Each 1D  $^1\text{H}$  NMR spectrum was Fourier transformed, phased, referenced to TMSP and aligned with icoshift(7) to obtain a data matrix. The 1D  $^1\text{H}$  NMR data matrix was then binned using the intelligent adaptive binning algorithm,(8) UV scaling, and normalized using the Probabilistic Quotient (PQ) method. The 2D  $^1\text{H}$ - $^{13}\text{C}$  NMR data was Fourier transformed and phased. The 2D  $^1\text{H}$ - $^{13}\text{C}$  HSQC spectra were visualized and peak-picked using NMRviewJ (version 8.0). Discriminatory features were identified to specific metabolites using Chenomx Suite 8.0, Human Metabolome Database (HMDB),(9) SpinAssin,(10) and BMRB.(11) A  $^1\text{H}$  and  $^{13}\text{C}$  chemical shift error of 0.08 and 0.25 ppm, respectively, was used to match experimental chemical shifts to reference spectra.

### **LC-MS data collection and processing**

For LC-MS analysis, dried metabolome extracts were reconstituted in 20  $\mu\text{L}$  of 0.1% formic acid and centrifuged at 15,000  $\times g$  at 4  $^\circ\text{C}$  for 10 min to remove particulates. Quality control (QC) samples were prepared by pooling 5  $\mu\text{L}$  from each experimental metabolomics sample. An LC-MS spectrum was acquired for five QC samples prior to analyzing the metabolome extracts. In addition, two QC samples were analyzed after every 12 injections of experimental metabolomics samples to monitor system stability.

The metabolome analyses were performed using an ACQUITY Ultra-Performance Liquid Chromatography (UPLC) system (Waters, Milford, MA, USA) coupled to a Waters Xevo G2-XS

Q-TOF mass spectrometer (Waters Co., Milford, MA, USA.) with an electrospray ionization (ESI) mode. An ACQUITY UPLC HSS T3 C18 (1.0 × 50 mm, 1.8µm, Waters Co., Milford, MA, USA) column was used. Column and autosampler temperature were set to 40° C and 8 °C, respectively. The flow rate was set to 100 µL/min. The mobile phase was composed of 0.1% formic acid in water (A) and 0.1% formic acid in acetonitrile (B). 2 µL of a metabolome extract or a QC sample were injected and separated with a linear gradient program from 1% to 95% B in 7.30 min, held at 95% for 1.5 min and re-equilibrate for 1.2 min.

The ESI source was set to positive mode, and the capillary and cone voltages were set to 3.15 kV and 40 V, respectively. The source temperature was set to 120 °C, the cone gas flow was set to 50 L/h, and the desolvation temperature and flow rate were set to 300 °C and 857 L/h, respectively. Data collection was in the data-independent acquisition mode (MSE). The quadrupole was set to transfer all ions and alternate collision energy from low (4 eV) to high (ramped from 15 to 45 eV) energies with a *m/z* scan range of 50 to 2000 Da. The time of flight mass analyzer was calibrated with an external mass calibrant (Leucine-Enkephalin [M+H]<sup>+</sup>=556.2771) infused via the Lock-mass channel.

Following acquisition, raw LC-MS data were imported into Progenesis QI v.2.1 (Non-linear Dynamics, Newcastle, UK) for automatic alignment, detection and deconvolution. 2D ion intensity maps were generated and the retention times were aligned using a QC pooled spectrum as a reference. The peak detection parameters were as follows: the sensitivity method value was set to 3, no minimum peak width and no retention time limits were used. Adducts of the same compound were automatically grouped during deconvolution using a list ([M + H]<sup>+</sup>, [M + Na]<sup>+</sup>, [M + K],

$[M + NH_4]^+$ ,  $[M + H - H_2O]^+$ ,  $[M + H - 2H_2O]^+$ ,  $[M + ACN + H]^+$ ,  $[M + CH_3OH + H]^+$  and  $[M + ACN + Na]^+$ ) of adducts pre-defined from a raw data import. Normalization was computed to the mean log ratio (MLR) algorithm in Progenesis. Features not present in at least 50% of one experimental group or not present in the QC spectrum with a coefficient of variation (CV) of  $\leq 30\%$  were removed. Batch or run order variance were removed with LOESS QC corrections.(12) Putative annotation of metabolites was performed by MetaScope with a theoretical fragment search against HMDB.(9) The putative metabolite assignment was performed according to parameters, including Score, Fragmentation score, and Isotope similarity by Progenesis QI. Only statistically significant features were submitted for identification.

### **NMR and MS data analyses**

All unsupervised and supervised multivariate statistics were conducted using MVAPACK in OCTAVE (4.4.1).(6) Unless otherwise stated, unit variance (UV) scaling was applied to both X and Y inputs before NIPAL implementation for Partial Least Squares/Projection to Latent Structures (PLS) and Orthogonal Projection to Latent Structures (OPLS) with successive iterations halted based on the cross-validated (7-fold CV) and fraction of Y variation modelled ( $Q^2$ ). CV-ANOVA, permutation testing ( $n = 1000$ ), and Variable Importance in Projection scores ( $VIP > 1$ ) were used for model validation and evaluation, respectively. Shared and Unique (SUS) principles using  $p(\text{corr})$  were adopted to facilitate model interpretation. All univariate statistics were conducted using 'Limma' or 'Stats' in R (3.5.2).(13) Unless otherwise stated, log2 transformations were applied before concurrent linear fits by generalized least squares and computed moderated T-statistics, F-statistics and log-odds by empirical Bayes moderation of standard errors to a common value (Limma). Respective p-values were adjusted for multiple testing by Benjamini–

Hochberg (BH) and q-values calculated to the expected false discovery rate (FDR), with significance to  $< 0.05$ . MetaboAnalyst software was used to access 'Pathways Analysis' and 'Pathways Enrichment' of all significantly altered metabolites (14).

## References

1. Nagana Gowda GA & Raftery D (2017) Whole Blood Metabolomics by  $^1\text{H}$  NMR Spectroscopy Provides a New Opportunity To Evaluate Coenzymes and Antioxidants. *Analytical Chemistry* 89(8):4620-4627.
2. Nguyen BD, Meng X, Donovan KJ, & Shaka AJ (2007) SOGGY: Solvent-optimized double gradient spectroscopy for water suppression. A comparison with some existing techniques. *Journal of Magnetic Resonance* 184(2):263-274.
3. Worley B & Powers R (2015) Deterministic multidimensional nonuniform gap sampling. *Journal of Magnetic Resonance* 261:19-26.
4. Orekhov VY & Jaravine VA (2011) Analysis of non-uniformly sampled spectra with multi-dimensional decomposition. *Progress in Nuclear Magnetic Resonance Spectroscopy* 59:271-292.
5. Delaglio F, *et al.* (1995) NMRPipe: A multidimensional spectral processing system based on UNIX pipes. *Journal of Biomolecular NMR* 6(3):277-293.
6. Worley B & Powers R (2014) MVAPACK: a complete data handling package for NMR metabolomics. *ACS Chem Biol* 9(5):1138-1144.
7. Savorani F, Tomasi G, & Engelsen SB (2010) icoshift: A versatile tool for the rapid alignment of 1D NMR spectra. *Journal of Magnetic Resonance* 202(2):190-202.
8. Worley B & Powers R (2015) Generalized adaptive intelligent binning of multiway data. *Chemometrics and Intelligent Laboratory Systems* 146:42-46.



9. Wishart DS, *et al.* (2013) HMDB 3.0--The Human Metabolome Database in 2013. *Nucleic Acids Research* 41(Database issue):D801-D807.
10. Yamada S, *et al.* (2019) InterSpin: Integrated Supportive Webtools for Low- and High-Field NMR Analyses Toward Molecular Complexity. *ACS Omega* 4(2):3361-3369.
11. Ulrich EL, *et al.* (2008) BioMagResBank. *Nucleic Acids Research* 36(suppl\_1):D402-D408.
12. Gagnebin Y, *et al.* (2017) Metabolomic analysis of urine samples by UHPLC-QTOF-MS: Impact of normalization strategies. *Anal Chim Acta* 955:27-35.
13. Dessau RB & Pipper CB (2008) "R"--project for statistical computing. *Ugeskr Laeger* 170(5):328-330.
14. Chong J, Wishart DS, & Xia J (2019) Using MetaboAnalyst 4.0 for Comprehensive and Integrative Metabolomics Data Analysis. *Current Protocols in Bioinformatics* 68(1).

**A**

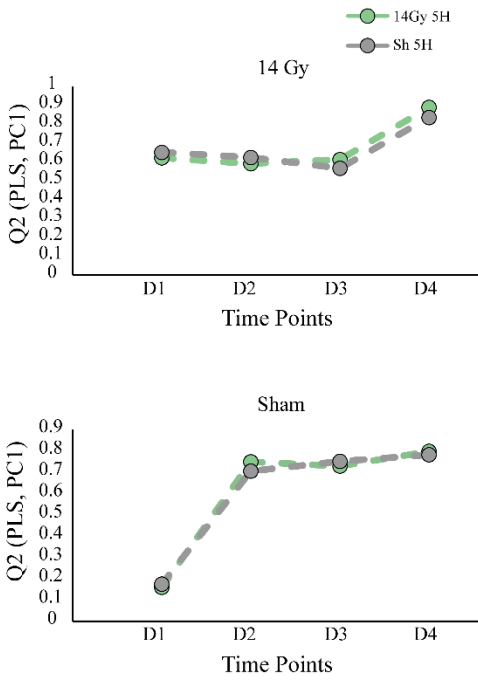

**C**

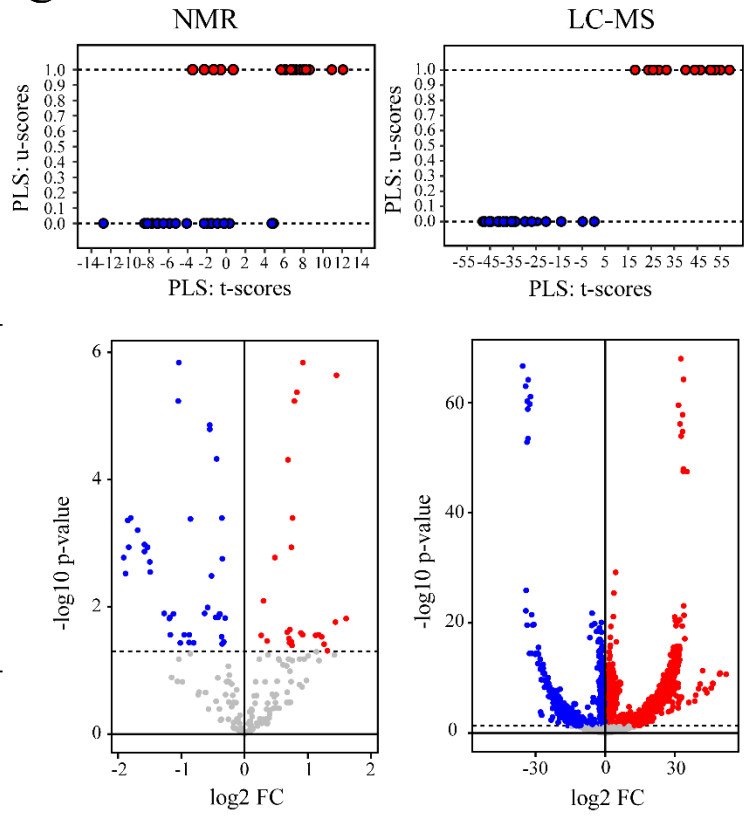

**B**

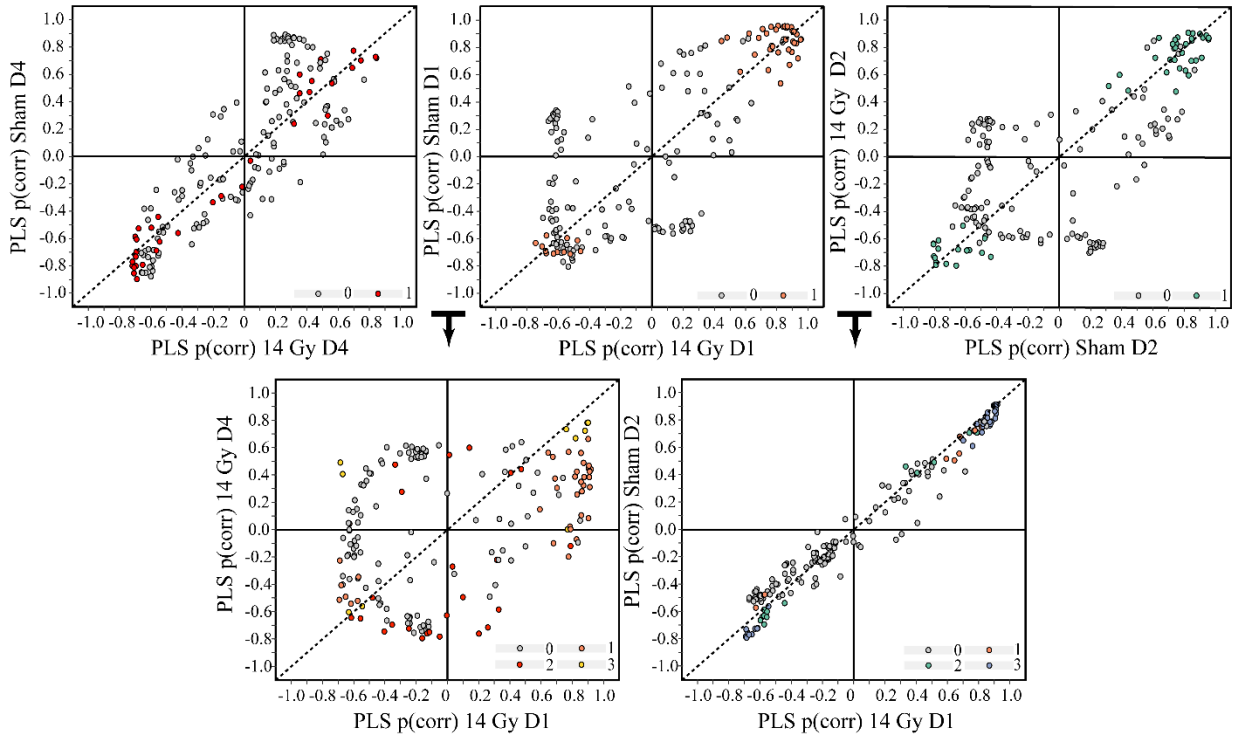

D

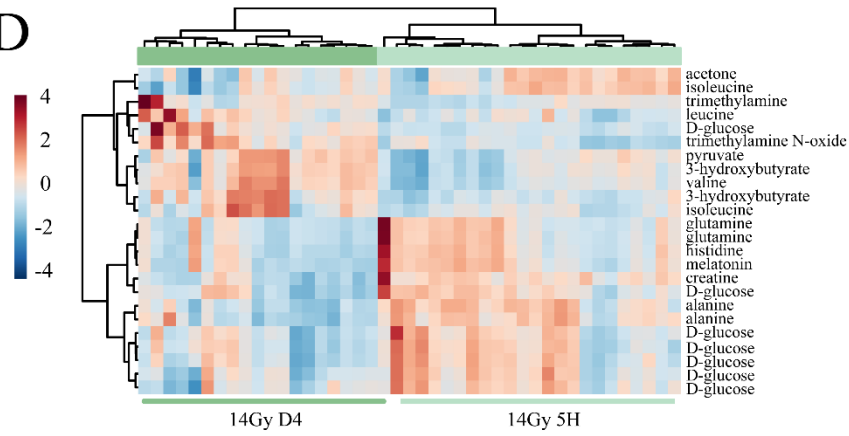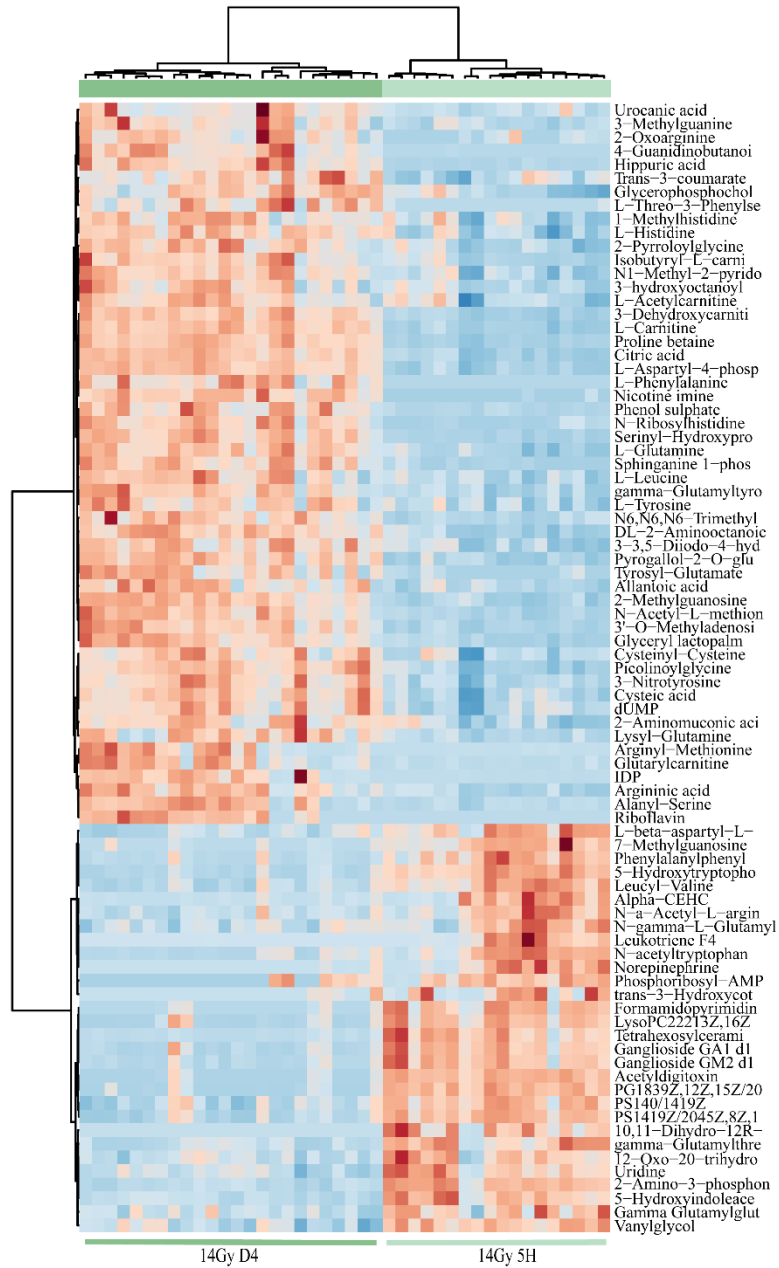

**Figure S1.** NMR and LC-MS time-dependent metabolomics analysis of cohort 1 for following 14 Gy  $^{60}\text{Co-}\gamma$ -radiation exposure. **(A)** LC-MS metabolic trajectories of 14 Gy (*top*) and Sham (*bottom*) groups calculated by PLS (one Predictive Component (PC), Unit Variance (UV), 7-fold Cross Validation) from a baseline norm (5H) and visualized across time ( $Q^2$ ). \* indicates models p-value < 0.05 **(B)** Model analysis by SUS principles for significant effects as a result of radiation across two time points 14GyD4, 14GyD1 and a control ShD2 showing within and between group comparisons. **(C)** T v U scores plot (PLS - 1 Predictive Component, Unit Variance, 7-fold Cross Validation) comparing 14 Gy D4 to 5H baseline NMR data (*left*) and LC-MS data (*right*) and p-value v fold change volcano plot (LIMMA - moderated T-test, Benjamini-Hochberg correction) comparing 14 Gy D4 to 5H baseline NMR data (*left*) and LC-MS data (*right*) **(D)** Heatmap of NMR (*top*) LC-MS (*bottom*) mice serum for 14Gy D4 (vs 5H).

**A**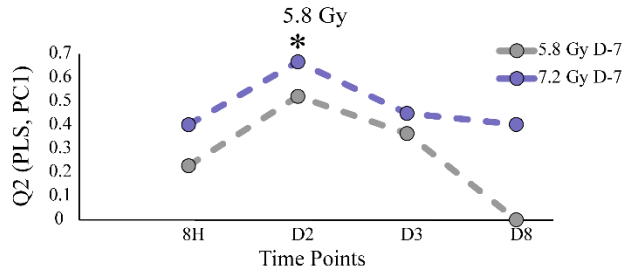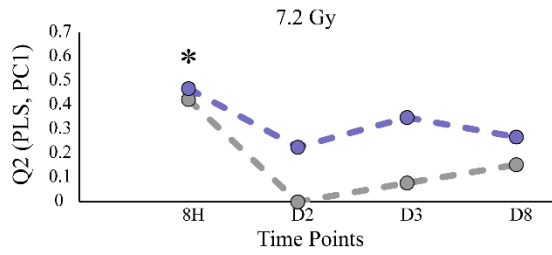**B**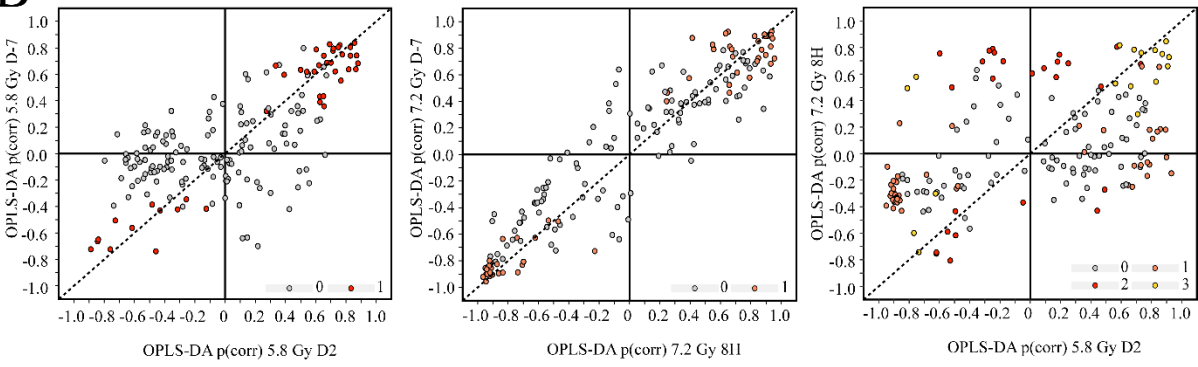**C**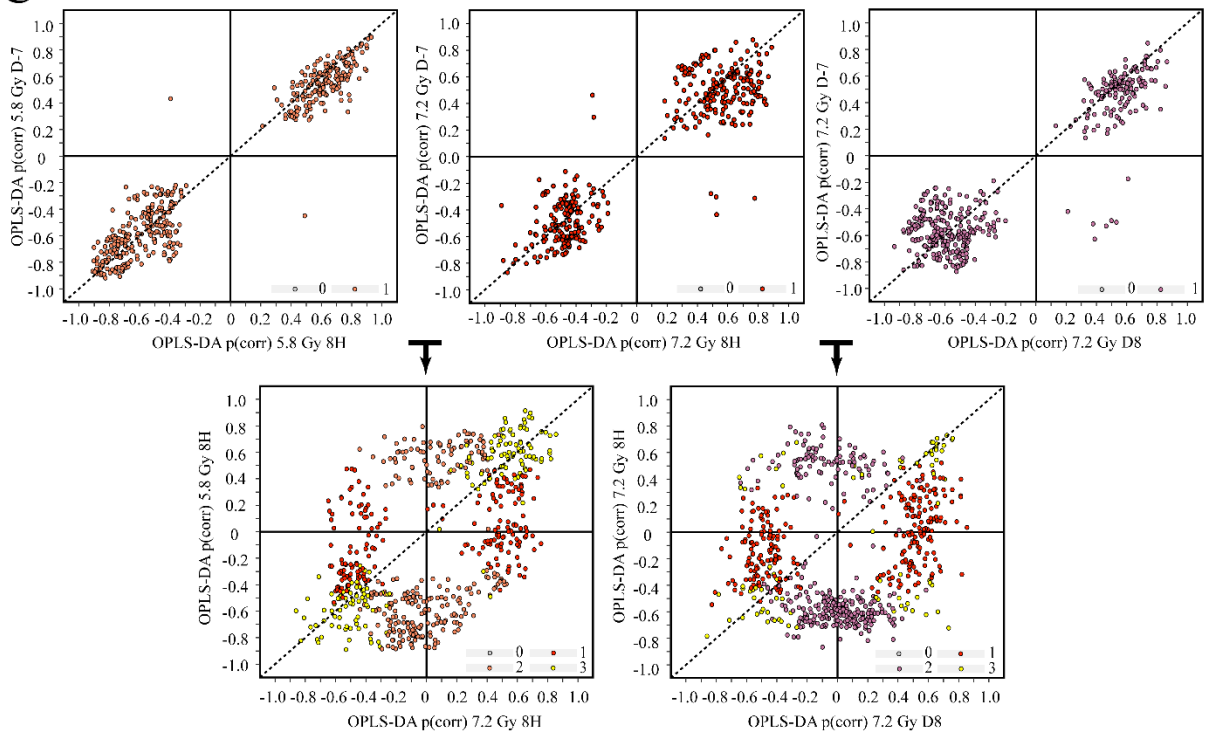

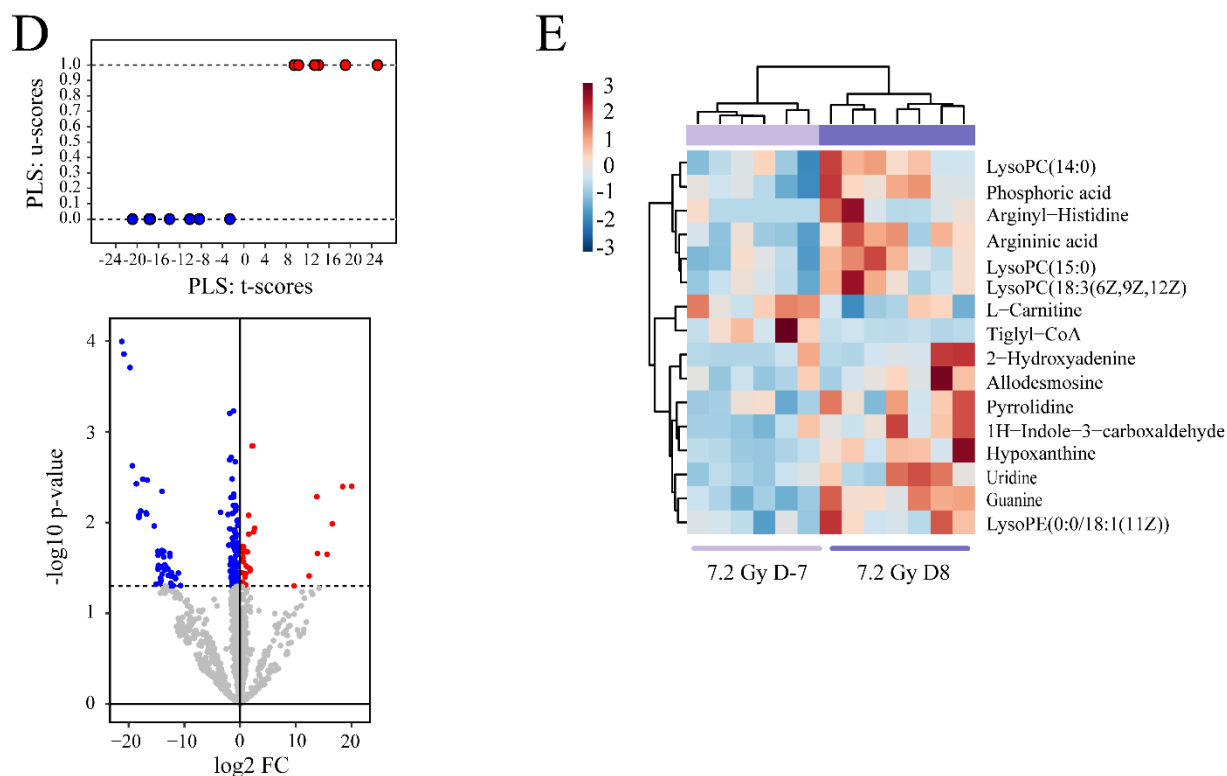

**Figure S2.** LC-MS time-dependent metabolomics analysis of cohort 2 samples following either 5.8 or 7.2 Gy  $^{60}\text{Co-}\gamma$ -radiation exposure. **(A)** NMR metabolic trajectories from NHP serum after exposure to 5.8 Gy (*top*) or 7.2 Gy (*bottom*) radiation dose. Metabolic trajectories were calculated by PLS (one Predictive Component (PC), Unit Variance (UV), 7-fold Cross Validation) from a baseline norm (5H) and visualized across time ( $Q^2$ ). \* indicates models p-value < 0.05 **(B)** NMR model analysis by SUS principles for significant effects (VIP >1) as a result of radiation across within group 5.8 Gy D2 and 7.2 Gy 8H compared to respective controls and between group comparison of 5.8 Gy D2 and 7.2 Gy 8H. **(C)** LC-MS model analysis by SUS principles for significant effects (VIP > 1) as a result of radiation across within group comparisons 5.8 Gy 8H, 7.2 Gy 8H, and 7.2 Gy D8 compared to respective controls and between group comparisons 5.8 Gy 8H vs 7.2 Gy 8H and 7.2 Gy 8H vs 7.2 Gy D8. **(D)** LC-MS T v U scores plot (*top*) (PLS - 1 Predictive Component, Unit Variance, 7-fold Cross Validation) comparing 7.2 Gy D8 to 7.2 Gy

D-7 baseline LC-MS data and a p-value versus fold change volcano plot (*bottom*) comparing LC-MS data 7.2 Gy D1 to D4 (LIMMA - moderated T-test, Benjamini-Hochberg correction). **(E)** Heatmap of putative LC-MS metabolite IDs comparing 7.2 Gy D-7 (light purple) to 7.2 Gy D8 (dark purple).

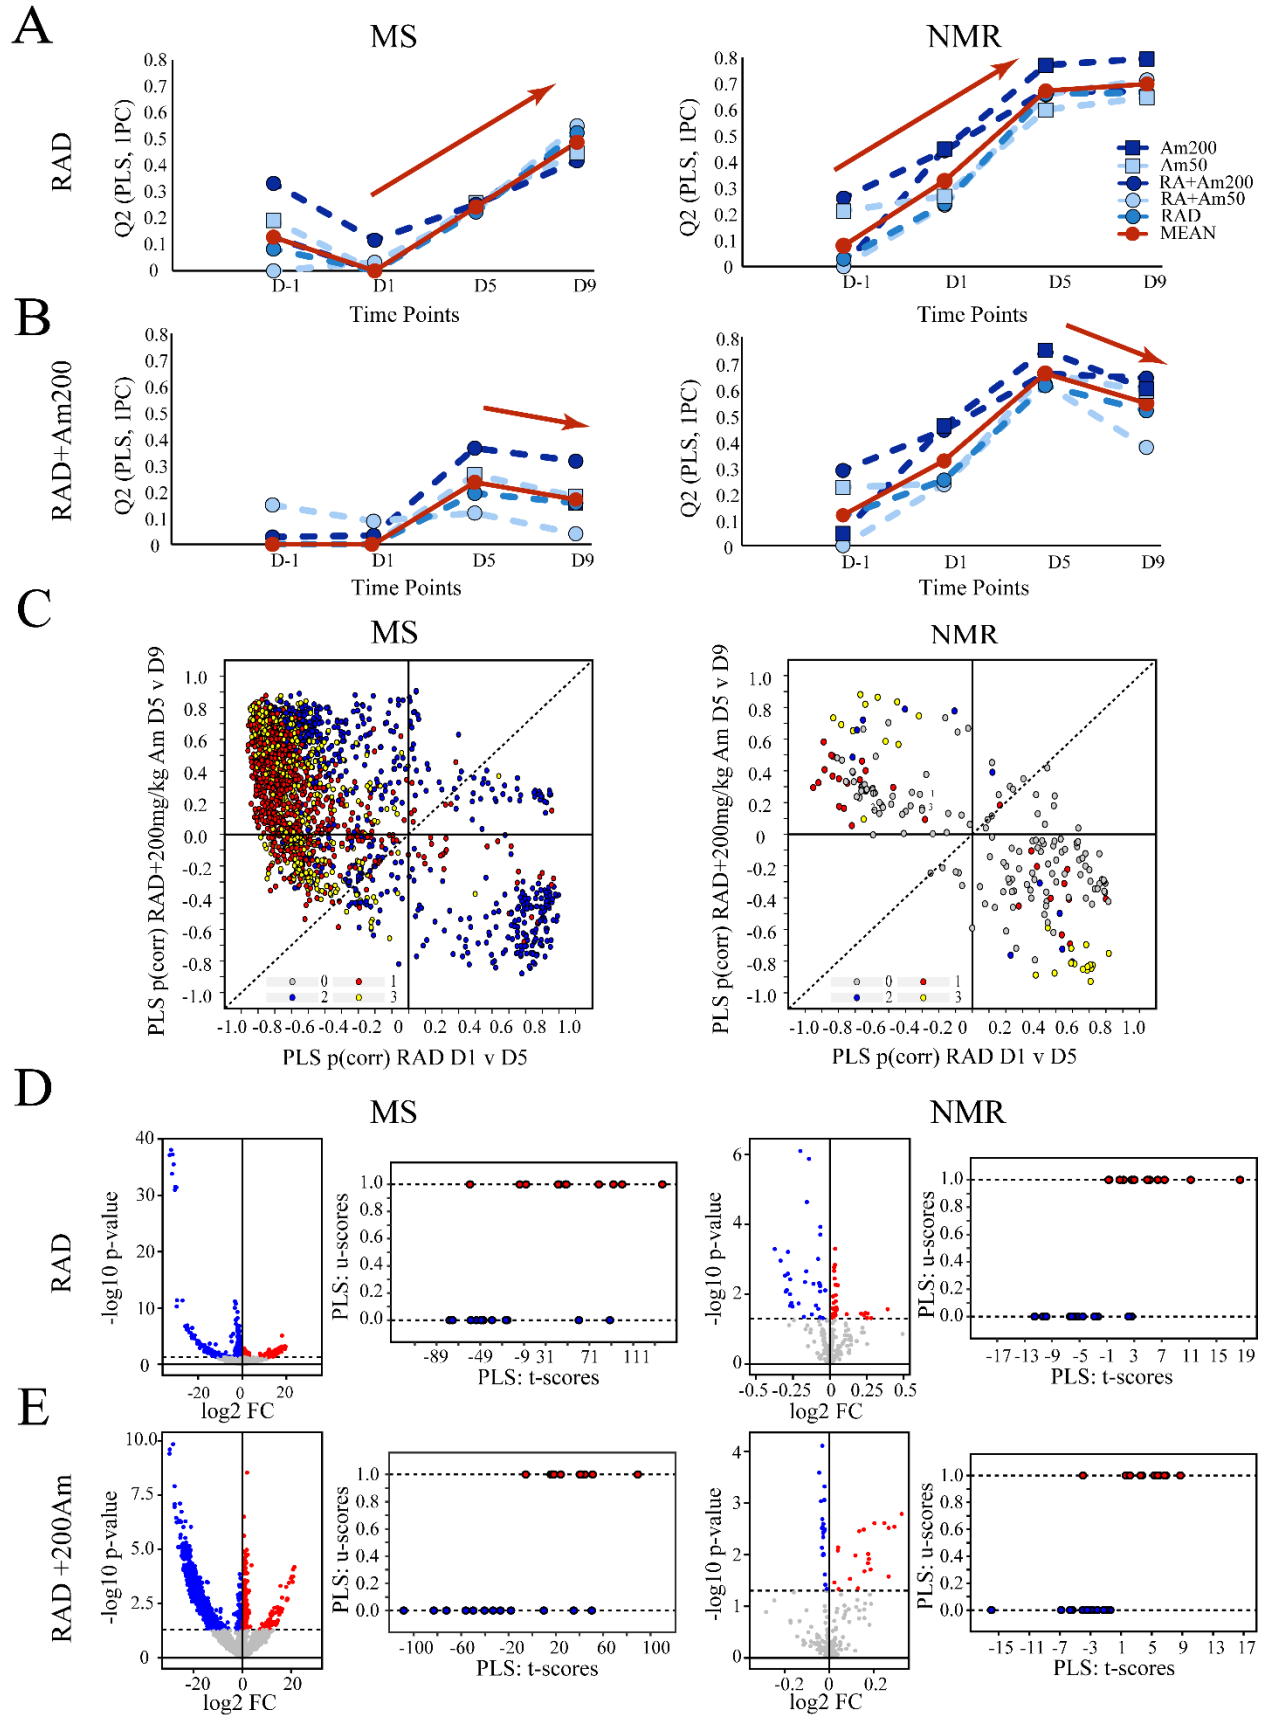



**Figure S3.** Combined  $^1\text{H}$  NMR and LC-MS metabolomic analysis of cohort 3 exposed to 9.6 Gy  $^{60}\text{Co}$   $\gamma$ -radiation. **(A)** 0 mg/kg (RAD) and **(B)** 200 mg/kg (RAD\_Am200) – trajectories calculated by PLS (1 Predictive Component (PC), Unit Variance (UV), 7-fold Cross Validation), from a baseline norm (D-5), visualized across time (Q2). **(C)** LC-MS (*left*) and NMR (*right*) model analysis by SUS principles for significant effects (VIP >1) as a result of radiation for between group comparison RAD D1 vs D5 and RAD+200mg/kg D5 vs D9 **(D-E)** LC-MS and NMR T v U scores plot (PLS - 1 Predictive Component, Unit Variance, 7-fold Cross Validation) and p-value v FC volcano plot (LIMMA - moderated T-test, Benjamini-Hochberg correction) for 9.6 Gy radiation exposure (RAD D1 vs D5) and 9.6 Gy radiation exposure with amifostine treatment at 200mg/kg (RAD+Am200 D5 vs D9).

A

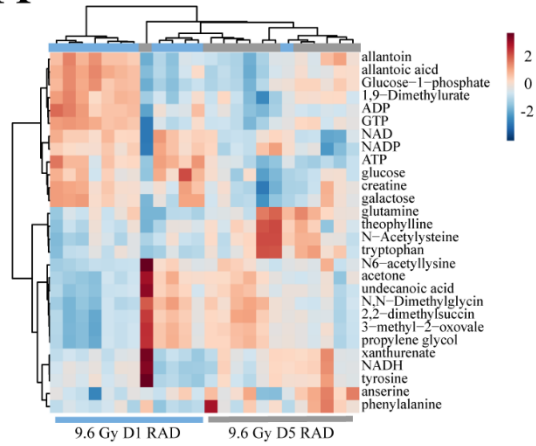

C

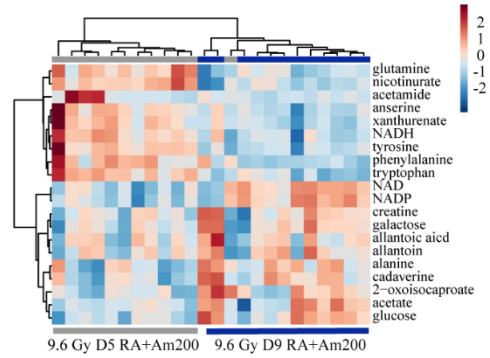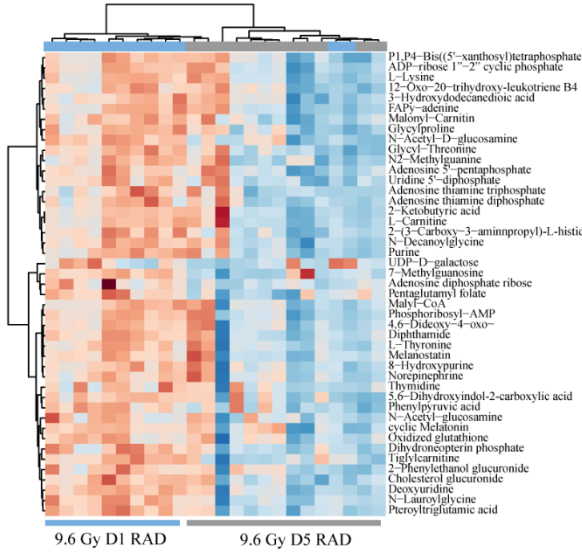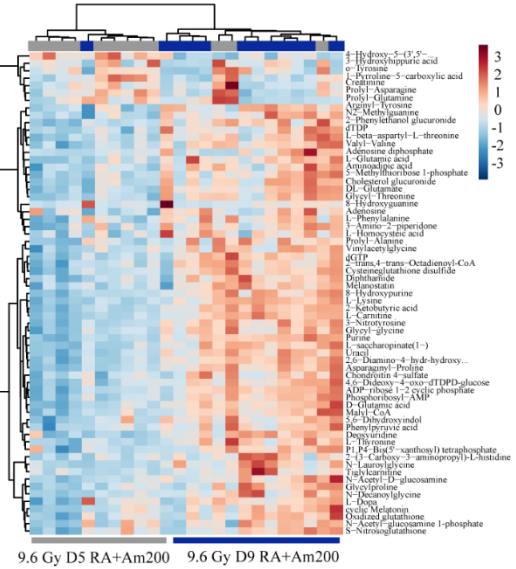

B

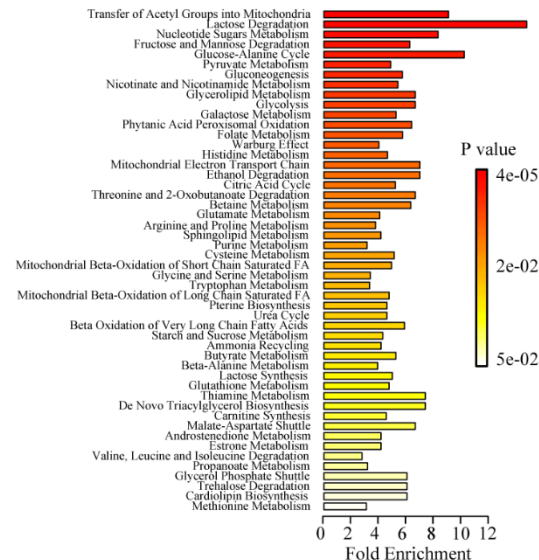

D

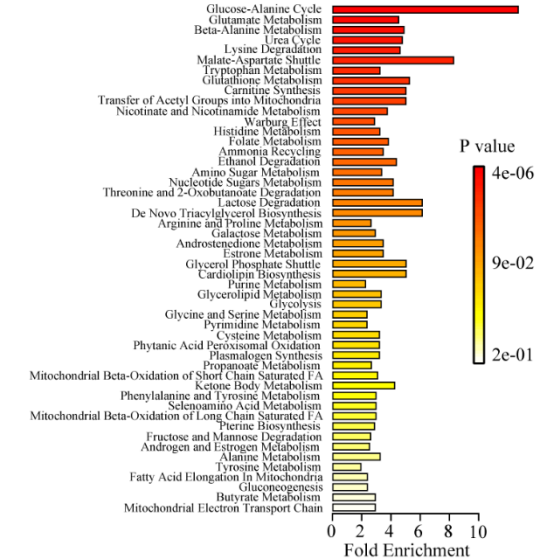

**Figure S4.** Combined  $^1\text{H}$  NMR and LC-MS pathway analysis of cohort 3 exposed to 9.6 Gy  $^{60}\text{Co}$   $\gamma$ -radiation. **(A)** Heatmap of 9.6 Gy D1 (light blue) vs D5 (gray) NMR putative metabolite IDs (*top*) and LC-MS putative metabolite IDs (*bottom*). **(B)** MetaboAnalyst pathway enrichment analysis of NMR and LC-MS metabolites from (A). Top perturbed pathways are displayed by fold enrichment. **(C)** Heatmap of 9.6 Gy and 200mg/kg amifostine treatment D5 (gray) vs D9 (navy blue) NMR putative metabolite IDs (*top*) and LC-MS putative metabolite IDs (*bottom*). **(D)** MetaboAnalyst pathway enrichment analysis of NMR and LC-MS metabolites from (C). Top perturbed pathways are displayed by fold enrichment.

**Table S1.** Perturbed Metabolites of Cohort 1

| Metabolite ID                               | VIP   | pcorr  | FC      | t-score | p-value | FDR   |
|---------------------------------------------|-------|--------|---------|---------|---------|-------|
| 10,11-Dihydro-12R-hydroxy-leukotriene E4    | 1.473 | 0.644  | 32.452  | 16.737  | 0.000   | 0.000 |
| 12-Oxo-20-trihydroxy-leukotriene B4         | 1.469 | 0.623  | 1.285   | 5.309   | 0.000   | 0.000 |
| 1-Methylhistidine                           | 1.252 | -0.669 | -0.731  | -4.878  | 0.000   | 0.000 |
| 2-Amino-3-phosphonopropionic acid           | 1.855 | 0.821  | 1.828   | 12.216  | 0.000   | 0.000 |
| 2-Aminomuconic acid semialdehyde            | 1.355 | -0.749 | -0.995  | -6.156  | 0.000   | 0.000 |
| 2-Methylguanosine                           | 1.710 | -0.849 | -1.448  | -11.192 | 0.000   | 0.000 |
| 2-Oxoarginine                               | 1.136 | -0.399 | -16.821 | -4.754  | 0.000   | 0.000 |
| 2-Pyrrolyl glycine                          | 1.366 | -0.782 | -0.456  | -5.297  | 0.000   | 0.000 |
| 3-(3,5-Diiodo-4-hydroxyphenyl)pyruvate      | 1.456 | -0.740 | -10.248 | -3.425  | 0.001   | 0.004 |
| 3-Dehydroxycarnitine                        | 1.914 | -0.926 | -1.830  | -16.483 | 0.000   | 0.000 |
| 3-Hydroxybutyrate                           | 2.248 | 0.548  | 0.763   | 6.037   | 0.000   | 0.000 |
| 3-hydroxyoctanoyl carnitine                 | 1.252 | -0.679 | -1.011  | -5.247  | 0.000   | 0.000 |
| 3-Nitrotyrosine                             | 1.529 | -0.841 | -0.455  | -6.481  | 0.000   | 0.000 |
| 3'-O-Methyladenosine                        | 1.752 | -0.852 | -1.437  | -12.991 | 0.000   | 0.000 |
| 4-Guanidinobutanoic acid                    | 1.445 | -0.607 | -12.412 | -5.403  | 0.000   | 0.000 |
| 5-Hydroxyindoleacetic acid                  | 1.709 | 0.740  | 2.236   | 9.615   | 0.000   | 0.000 |
| 5-Hydroxytryptophol glucuronide             | 1.796 | 0.959  | 3.481   | 9.317   | 0.000   | 0.000 |
| 7-Methylguanidine                           | 1.391 | -0.604 | -1.542  | -6.151  | 0.000   | 0.000 |
| 7-Methylguanosine                           | 1.462 | 0.817  | 23.269  | 6.309   | 0.000   | 0.000 |
| Acetyldigitoxin                             | 1.818 | 0.922  | 28.724  | 7.150   | 0.000   | 0.000 |
| Alanyl-Serine                               | 1.539 | -0.791 | -1.199  | -7.794  | 0.000   | 0.000 |
| Allantoic acid                              | 1.478 | -0.775 | -1.090  | -7.711  | 0.000   | 0.000 |
| Alpha-CEHC                                  | 1.282 | 0.753  | 2.840   | 5.057   | 0.000   | 0.000 |
| Argininic acid                              | 1.647 | -0.770 | -2.507  | -8.848  | 0.000   | 0.000 |
| Arginyl-Methionine                          | 1.167 | -0.628 | -16.887 | -3.968  | 0.001   | 0.001 |
| Citric acid                                 | 1.841 | -0.893 | -1.570  | -13.256 | 0.000   | 0.000 |
| Creatine                                    | 1.806 | -0.759 | -0.876  | -4.674  | 0.001   | 0.012 |
| Cysteic acid                                | 1.543 | -0.836 | -0.593  | -6.901  | 0.000   | 0.000 |
| Cysteinyl-Cysteine                          | 1.322 | -0.751 | -0.423  | -4.998  | 0.000   | 0.000 |
| D-Glucose                                   | 1.810 | 0.477  | 0.773   | 5.433   | 0.000   | 0.001 |
| DL-2-Aminooctanoic acid                     | 1.671 | -0.805 | -1.162  | -10.025 | 0.000   | 0.000 |
| dUMP                                        | 1.447 | -0.792 | -0.540  | -6.096  | 0.000   | 0.000 |
| Formamidopyrimidine nucleoside triphosphate | 1.510 | 0.782  | 28.280  | 7.894   | 0.000   | 0.000 |
| Gamma Glutamylglutamic acid                 | 1.279 | 0.582  | 1.100   | 3.916   | 0.001   | 0.003 |
| gamma-Glutamylthreonine                     | 1.578 | 0.670  | 0.917   | 7.784   | 0.000   | 0.000 |
| Gamma-Glutamyltyrosine                      | 1.574 | -0.726 | -1.156  | -8.747  | 0.000   | 0.000 |
| Ganglioside GA1 (d18:1/16:0)                | 1.517 | 0.771  | 4.157   | 4.865   | 0.006   | 0.012 |
| Ganglioside GM2 (d18:1/18:1(11Z))           | 1.676 | 0.807  | 2.856   | 8.984   | 0.000   | 0.000 |
| Glutaminyl-Lysine                           | 1.398 | -0.694 | -3.651  | -2.398  | 0.021   | 0.039 |
| Glutaryl carnitine                          | 1.310 | -0.700 | -10.734 | -2.780  | 0.011   | 0.022 |
| Glycerophosphocholine                       | 1.448 | -0.776 | -0.882  | -6.192  | 0.000   | 0.000 |
| Glyceryl lactopalmitate                     | 1.712 | -0.865 | -2.017  | -11.928 | 0.000   | 0.000 |
| Hippuric acid                               | 1.665 | -0.721 | -17.779 | -5.700  | 0.000   | 0.000 |
| IDP                                         | 1.223 | -0.650 | -6.609  | -4.149  | 0.000   | 0.001 |
| L-Acetylcarnitine                           | 1.216 | -0.701 | -0.379  | -4.112  | 0.000   | 0.001 |
| L-Alanine                                   | 1.890 | -0.626 | -0.385  | -4.250  | 0.002   | 0.014 |
| L-Aspartyl-4-phosphate                      | 1.901 | -0.914 | -0.964  | -14.119 | 0.000   | 0.000 |
| L-beta-aspartyl-L-threonine                 | 1.434 | 0.658  | 0.458   | 5.678   | 0.000   | 0.000 |
| L-Carnitine                                 | 1.935 | -0.952 | -1.630  | -17.887 | 0.000   | 0.000 |
| Leucyl-Valine                               | 1.498 | 0.855  | 0.917   | 7.046   | 0.000   | 0.000 |
| Leukotriene F4                              | 1.205 | 0.648  | 24.627  | 6.666   | 0.000   | 0.000 |
| L-Glutamine                                 | 1.199 | -0.759 | -1.343  | -3.797  | 0.001   | 0.010 |
| L-Glutamine                                 | 1.563 | -0.709 | -1.605  | -6.100  | 0.000   | 0.000 |
| L-Histidine                                 | 1.524 | -0.784 | -0.765  | -6.539  | 0.000   | 0.000 |
| L-Histidine                                 | 1.205 | -0.781 | -1.565  | -3.919  | 0.001   | 0.011 |
| L-Isoleucine                                | 1.185 | -0.511 | -0.586  | -4.436  | 0.002   | 0.005 |
| L-Isoleucine                                | 1.588 | 0.278  | 0.479   | 3.175   | 0.006   | 0.022 |
| L-Leucine                                   | 1.860 | 0.416  | 0.399   | 4.214   | 0.001   | 0.004 |
| L-Phenylalanine                             | 1.536 | -0.698 | -30.810 | -19.686 | 0.000   | 0.000 |

|                                      |       |        |         |         |       |       |
|--------------------------------------|-------|--------|---------|---------|-------|-------|
| L-Tyrosine                           | 1.267 | -0.575 | -7.322  | -2.574  | 0.021 | 0.038 |
| LysoPC(22:2(13Z,16Z))                | 1.357 | 0.742  | 5.983   | 4.935   | 0.002 | 0.005 |
| Melatonin                            | 1.198 | -0.793 | -1.448  | -3.675  | 0.005 | 0.031 |
| N1-Methyl-2-pyridone-5-carboxamide   | 1.408 | -0.734 | -0.774  | -5.873  | 0.000 | 0.000 |
| N6,N6,N6-Trimethyl-L-lysine          | 1.369 | -0.647 | -4.181  | -2.743  | 0.012 | 0.023 |
| N-a-Acetyl-L-arginine                | 1.139 | 0.712  | 1.298   | 4.614   | 0.000 | 0.000 |
| N-Acetyl-L-methionine                | 1.767 | -0.848 | -2.431  | -13.519 | 0.000 | 0.000 |
| N-acetyltryptophan                   | 1.376 | 0.785  | 1.483   | 5.892   | 0.000 | 0.000 |
| N-gamma-L-Glutamyl-D-alanine         | 1.145 | 0.690  | 1.232   | 3.285   | 0.002 | 0.005 |
| Nicotine imine                       | 1.763 | -0.797 | -27.502 | -11.236 | 0.000 | 0.000 |
| N-Ribosylhistidine                   | 1.640 | -0.710 | -16.569 | -4.893  | 0.000 | 0.000 |
| O-isobutyryl-L-carnitine             | 1.449 | -0.705 | -0.978  | -7.048  | 0.000 | 0.000 |
| PG(18:3(9Z,12Z,15Z)/20:3(5Z,8Z,11Z)) | 1.791 | 0.913  | 20.073  | 5.208   | 0.000 | 0.000 |
| Phenol sulphate                      | 1.536 | -0.785 | -6.519  | -3.174  | 0.003 | 0.007 |
| Phenylalanylphenylalanine            | 1.457 | 0.823  | 3.120   | 7.195   | 0.000 | 0.000 |
| Phenylpyruvic acid                   | 1.296 | -0.569 | -22.132 | -6.737  | 0.000 | 0.000 |
| Phosphoribosyl-AMP                   | 1.247 | 0.649  | 21.065  | 8.395   | 0.000 | 0.000 |
| p-Hydroxyphenylacetic acid           | 1.235 | 0.689  | 38.628  | 6.468   | 0.000 | 0.000 |
| Picolinoylglycine                    | 1.783 | -0.935 | -1.108  | -10.522 | 0.000 | 0.000 |
| Proline betaine                      | 1.924 | -0.913 | -1.607  | -19.221 | 0.000 | 0.000 |
| PS(14:0/14:1(9Z))                    | 1.336 | 0.743  | 1.464   | 5.152   | 0.000 | 0.000 |
| PS(20:4(5Z,8Z,11Z,14Z)/14:1(9Z))     | 1.580 | 0.855  | 2.828   | 6.092   | 0.000 | 0.000 |
| Pyrogallol-2-O-glucuronide           | 1.663 | -0.736 | -1.152  | -9.817  | 0.000 | 0.000 |
| Pyruvate                             | 1.749 | 0.725  | 0.684   | 2.655   | 0.011 | 0.050 |
| Riboflavin                           | 1.467 | -0.647 | -25.009 | -8.450  | 0.000 | 0.000 |
| Seriny-Hydroxyproline                | 1.709 | -0.751 | -2.468  | -13.042 | 0.000 | 0.000 |
| Sphinganine 1-phosphate              | 1.701 | -0.803 | -16.537 | -5.334  | 0.000 | 0.000 |
| Tetrahexosylceramide (d18:1/16:0)    | 1.612 | 0.768  | 9.423   | 3.798   | 0.000 | 0.001 |
| Trans-3-coumarate                    | 1.158 | -0.487 | -0.432  | -4.460  | 0.000 | 0.001 |
| trans-3-Hydroxycotinine glucuronide  | 1.074 | 0.562  | 16.821  | 3.841   | 0.000 | 0.001 |
| Trimethylamine N-oxide               | 2.226 | 0.408  | 0.759   | 5.884   | 0.000 | 0.000 |
| Tyrosyl-Glutamate                    | 1.440 | -0.722 | -20.510 | -6.076  | 0.000 | 0.000 |
| Uridine                              | 1.488 | 0.643  | 0.782   | 6.354   | 0.000 | 0.000 |
| Urocanic acid                        | 1.261 | -0.500 | -1.633  | -7.595  | 0.000 | 0.000 |
| Valine                               | 2.354 | 0.784  | 0.831   | 5.198   | 0.000 | 0.000 |
| Vanylglycol                          | 1.386 | 0.741  | 0.670   | 4.958   | 0.001 | 0.002 |

**Table S2.** Perturbed Pathways of Cohort 1.

| <b>Enriched Pathways</b>                                          | <b>FC</b> | <b>p-value</b> | <b>FDR</b> |
|-------------------------------------------------------------------|-----------|----------------|------------|
| Methylhistidine Metabolism                                        | 0.250     | 0.299          | 1          |
| Glucose-Alanine Cycle                                             | 0.231     | 0.0909         | 1          |
| Transfer of Acetyl Groups into Mitochondria                       | 0.136     | 0.285          | 1          |
| Ammonia Recycling                                                 | 0.125     | 0.286          | 1          |
| Beta Oxidation of Very Long Chain Fatty Acids                     | 0.118     | 0.431          | 1          |
| Alanine Metabolism                                                | 0.118     | 0.431          | 1          |
| Phenylacetate Metabolism                                          | 0.111     | 0.552          | 1          |
| Lactose Degradation                                               | 0.111     | 0.552          | 1          |
| Phenylalanine and Tyrosine Metabolism                             | 0.107     | 0.43           | 1          |
| Urea Cycle                                                        | 0.103     | 0.454          | 1          |
| Pyruvaldehyde Degradation                                         | 0.100     | 0.59           | 1          |
| Carnitine Synthesis                                               | 0.091     | 0.571          | 1          |
| D-Arginine and D-Ornithine Metabolism                             | 0.091     | 0.625          | 1          |
| Taurine and Hypotaurine Metabolism                                | 0.083     | 0.658          | 1          |
| Glycolysis                                                        | 0.080     | 0.643          | 1          |
| Oxidation of Branched Chain Fatty Acids                           | 0.077     | 0.664          | 1          |
| Thyroid hormone synthesis                                         | 0.077     | 0.687          | 1          |
| Histidine Metabolism                                              | 0.070     | 0.725          | 1          |
| Warburg Effect                                                    | 0.069     | 0.745          | 1          |
| Tryptophan Metabolism                                             | 0.067     | 0.769          | 1          |
| Citric Acid Cycle                                                 | 0.063     | 0.773          | 1          |
| Glutamate Metabolism                                              | 0.061     | 0.805          | 1          |
| Amino Sugar Metabolism                                            | 0.061     | 0.788          | 1          |
| Gluconeogenesis                                                   | 0.057     | 0.815          | 1          |
| Nicotinate and Nicotinamide Metabolism                            | 0.054     | 0.839          | 1          |
| Glycine and Serine Metabolism                                     | 0.051     | 0.894          | 1          |
| Pyrimidine Metabolism                                             | 0.051     | 0.894          | 1          |
| Catecholamine Biosynthesis                                        | 0.050     | 0.834          | 1          |
| Riboflavin Metabolism                                             | 0.050     | 0.834          | 1          |
| Lactose Synthesis                                                 | 0.050     | 0.834          | 1          |
| Sphingolipid Metabolism                                           | 0.050     | 0.87           | 1          |
| Valine, Leucine and Isoleucine Degradation                        | 0.050     | 0.901          | 1          |
| Glutathione Metabolism                                            | 0.048     | 0.848          | 1          |
| Tyrosine Metabolism                                               | 0.042     | 0.956          | 1          |
| Cysteine Metabolism                                               | 0.038     | 0.904          | 1          |
| Mitochondrial Beta-Oxidation of Short Chain Saturated Fatty Acids | 0.037     | 0.912          | 1          |
| Selenoamino Acid Metabolism                                       | 0.036     | 0.92           | 1          |
| Mitochondrial Beta-Oxidation of Long Chain Saturated Fatty Acids  | 0.036     | 0.92           | 1          |
| Pterine Biosynthesis                                              | 0.034     | 0.927          | 1          |
| Beta-Alanine Metabolism                                           | 0.029     | 0.954          | 1          |
| Aspartate Metabolism                                              | 0.029     | 0.958          | 1          |
| Fatty Acid Biosynthesis                                           | 0.029     | 0.958          | 1          |
| Retinol Metabolism                                                | 0.027     | 0.965          | 1          |
| Purine Metabolism                                                 | 0.027     | 0.991          | 1          |
| Galactose Metabolism                                              | 0.026     | 0.968          | 1          |
| Propanoate Metabolism                                             | 0.024     | 0.978          | 1          |
| Fatty acid Metabolism                                             | 0.023     | 0.98           | 1          |
| Pyruvate Metabolism                                               | 0.021     | 0.987          | 1          |
| Arginine and Proline Metabolism                                   | 0.019     | 0.992          | 1          |

**Table S3.** Perturbed Metabolites of Cohort 2<sup>a</sup>

| <b>Metabolite ID</b>       | <b>VIP<sup>b</sup></b> | <b>Pcorr<sup>c</sup></b> | <b>FC<sup>d</sup></b> | <b>t-score<sup>e</sup></b> | <b>p-value<sup>f</sup></b> | <b>FDR<sup>g</sup></b> |
|----------------------------|------------------------|--------------------------|-----------------------|----------------------------|----------------------------|------------------------|
| 1H-Indole-3-carboxaldehyde | 1.871                  | -0.424                   | -1.956                | -2.710                     | 0.019                      | 0.461                  |
| 2-Hydroxyadenine           | 1.236                  | -0.260                   | -14.061               | -2.587                     | 0.025                      | 0.467                  |
| Allodesmosine              | 1.653                  | -0.548                   | -1.627                | -2.651                     | 0.042                      | 0.433                  |
| Argininic acid             | 2.346                  | -0.785                   | -1.287                | -3.826                     | 0.004                      | 0.317                  |
| Arginyl-Histidine          | 1.366                  | -0.557                   | -15.196               | -2.707                     | 0.027                      | 0.476                  |
| Guanine                    | 2.512                  | -0.790                   | -3.657                | -3.330                     | 0.006                      | 0.351                  |
| Hypoxanthine               | 2.197                  | -0.659                   | -1.774                | -4.665                     | 0.001                      | 0.208                  |
| L-Carnitine                | 2.242                  | 0.757                    | 0.818                 | 3.499                      | 0.014                      | 0.380                  |
| LysoPC(14:0)               | 1.995                  | -0.601                   | -0.908                | -2.720                     | 0.019                      | 0.452                  |
| LysoPC(15:0)               | 2.162                  | -0.673                   | -0.938                | -3.143                     | 0.009                      | 0.386                  |
| LysoPC(18:3(6Z,9Z,12Z))    | 1.827                  | -0.664                   | -0.664                | -2.427                     | 0.033                      | 0.489                  |
| LysoPE(0:0/18:1(11Z))      | 1.828                  | -0.744                   | -1.087                | -2.326                     | 0.039                      | 0.516                  |
| Phosphoric acid            | 1.879                  | -0.653                   | -0.628                | -2.434                     | 0.041                      | 0.566                  |
| Pyrrolidine                | 1.837                  | -0.616                   | -0.407                | -2.271                     | 0.047                      | 0.499                  |
| Tiglyl-CoA                 | 1.658                  | 0.519                    | 2.298                 | 3.386                      | 0.012                      | 0.398                  |
| Uridine                    | 1.858                  | -0.437                   | -0.778                | -2.498                     | 0.028                      | 0.510                  |

**Table S4.** Perturbed Pathways of Cohort 2.

| <b>Enriched Pathways</b>                                          | <b>FC</b> | <b>p-value</b> | <b>FDR</b> |
|-------------------------------------------------------------------|-----------|----------------|------------|
| Glycerol Phosphate Shuttle                                        | 0.091     | 0.160          | 1.000      |
| Beta Oxidation of Very Long Chain Fatty Acids                     | 0.059     | 0.237          | 1.000      |
| Vitamin B6 Metabolism                                             | 0.050     | 0.272          | 1.000      |
| Lactose Synthesis                                                 | 0.050     | 0.272          | 1.000      |
| Glutathione Metabolism                                            | 0.048     | 0.284          | 1.000      |
| Carnitine Synthesis                                               | 0.045     | 0.295          | 1.000      |
| Purine Metabolism                                                 | 0.041     | 0.103          | 1.000      |
| Glycolysis                                                        | 0.040     | 0.329          | 1.000      |
| Cysteine Metabolism                                               | 0.038     | 0.339          | 1.000      |
| Oxidation of Branched Chain Fatty Acids                           | 0.038     | 0.339          | 1.000      |
| Inositol Phosphate Metabolism                                     | 0.038     | 0.339          | 1.000      |
| Mitochondrial Beta-Oxidation of Short Chain Saturated Fatty Acids | 0.037     | 0.350          | 1.000      |
| Selenoamino Acid Metabolism                                       | 0.036     | 0.360          | 1.000      |
| Mitochondrial Beta-Oxidation of Long Chain Saturated Fatty Acids  | 0.036     | 0.360          | 1.000      |
| Urea Cycle                                                        | 0.034     | 0.371          | 1.000      |
| Pyrimidine Metabolism                                             | 0.034     | 0.234          | 1.000      |
| Ammonia Recycling                                                 | 0.031     | 0.401          | 1.000      |
| Fructose and Mannose Degradation                                  | 0.031     | 0.401          | 1.000      |
| Inositol Metabolism                                               | 0.030     | 0.410          | 1.000      |
| Gluconeogenesis                                                   | 0.029     | 0.429          | 1.000      |
| Nicotinate and Nicotinamide Metabolism                            | 0.027     | 0.447          | 1.000      |
| Propanoate Metabolism                                             | 0.024     | 0.491          | 1.000      |
| Fatty acid Metabolism                                             | 0.023     | 0.499          | 1.000      |
| Pyruvate Metabolism                                               | 0.021     | 0.539          | 1.000      |
| Glutamate Metabolism                                              | 0.020     | 0.546          | 1.000      |
| Arginine and Proline Metabolism                                   | 0.019     | 0.575          | 1.000      |
| Warburg Effect                                                    | 0.017     | 0.609          | 1.000      |
| Valine, Leucine and Isoleucine Degradation                        | 0.017     | 0.622          | 1.000      |
| Arachidonic Acid Metabolism                                       | 0.014     | 0.675          | 1.000      |



**Table S5.** Perturbed Metabolites of Cohort 3 RAD D1vD5

| <b>Metabolite ID</b>                    | <b>VIP</b> | <b>Pcorr</b> | <b>FC</b> | <b>t-score</b> | <b>p-value</b> | <b>FDR</b> |
|-----------------------------------------|------------|--------------|-----------|----------------|----------------|------------|
| 1,9-Dimethylurate                       | 1.332      | -0.796       | -0.269    | -2.470         | 0.021          | 0.115      |
| 2-(3-Carboxy-3-aminopropyl)-L-Histidine | 2.038      | -0.786       | -0.754    | -3.192         | 0.004          | 0.277      |
| 2,2-Dimethylsuccinic acid               | 1.201      | 0.796        | 0.392     | 2.361          | 0.027          | 0.120      |
| 3-Methyl-2-oxovalerate                  | 1.129      | 0.794        | 0.211     | 2.228          | 0.036          | 0.144      |
| Adenosine diphosphate ribose            | 1.697      | -0.503       | -9.139    | -2.202         | 0.038          | 0.615      |
| Adenosine thiamine triphosphate         | 1.429      | -0.695       | -0.705    | -2.308         | 0.030          | 0.578      |
| ADP                                     | 2.269      | -0.920       | -0.142    | -6.455         | 0.000          | 0.000      |
| Allantoic acid                          | 1.540      | -0.808       | -0.111    | -3.098         | 0.005          | 0.047      |
| Anserine                                | 1.990      | 0.799        | 0.036     | 4.045          | 0.000          | 0.015      |
| ATP                                     | 2.269      | -0.767       | -0.200    | -6.678         | 0.000          | 0.000      |
| Cholesterol glucuronide                 | 1.866      | -0.888       | -0.586    | -2.525         | 0.019          | 0.520      |
| Creatine                                | 1.515      | -0.714       | -0.292    | -2.922         | 0.008          | 0.059      |
| D-Galactose                             | 1.550      | -0.832       | -0.169    | -3.147         | 0.004          | 0.047      |
| D-Glucose                               | 1.735      | -0.641       | -0.334    | -3.728         | 0.001          | 0.022      |
| GTP                                     | 1.549      | -0.884       | -0.068    | -3.083         | 0.005          | 0.047      |
| L-Carnitine                             | 1.160      | -0.659       | -0.535    | -2.102         | 0.047          | 0.617      |
| L-Phenylalanine                         | 1.823      | 0.375        | 0.035     | 3.613          | 0.001          | 0.027      |
| L-Tryptophan                            | 1.887      | 0.708        | 0.029     | 3.548          | 0.002          | 0.029      |
| L-Tryptophan                            | 1.668      | 0.492        | 0.021     | 2.740          | 0.012          | 0.074      |
| Malonyl-Carnitin                        | 1.690      | -0.912       | -0.438    | -2.192         | 0.039          | 0.617      |
| N,N-Dimethylglycine                     | 1.046      | 0.776        | 0.280     | 2.086          | 0.048          | 0.153      |
| N6-acetyllysine                         | 1.115      | 0.749        | 0.114     | 2.212          | 0.037          | 0.144      |
| N-Acetyl-D-glucosamine                  | 2.142      | -0.878       | -0.874    | -3.069         | 0.005          | 0.317      |
| N-Acetylsteine                          | 1.375      | 0.569        | 0.024     | 2.369          | 0.027          | 0.120      |
| NAD+                                    | 1.965      | -0.660       | -0.065    | -4.418         | 0.000          | 0.008      |
| NADH                                    | 1.556      | -0.836       | -0.072    | -3.119         | 0.005          | 0.047      |
| NADP+                                   | 2.010      | -0.638       | -0.064    | -4.622         | 0.000          | 0.006      |
| N-Decanoylglycine                       | 1.729      | -0.811       | -0.639    | -2.370         | 0.027          | 0.567      |
| Phenylpyruvic acid                      | 1.620      | -0.758       | -0.735    | -2.616         | 0.015          | 0.487      |
| Phosphoribosyl-AMP                      | 1.407      | -0.887       | -0.502    | -2.124         | 0.045          | 0.617      |
| Propylene glycol                        | 1.062      | 0.787        | 0.252     | 2.084          | 0.048          | 0.153      |
| Purine                                  | 1.697      | -0.765       | -0.501    | -2.437         | 0.023          | 0.550      |
| Tiglylcarnitine                         | 2.386      | -0.754       | -1.848    | -2.817         | 0.010          | 0.412      |
| Undecanoic acid                         | 1.101      | 0.789        | 0.256     | 2.229          | 0.036          | 0.144      |
| Xanthurenate                            | 1.362      | 0.712        | 0.040     | 2.598          | 0.016          | 0.100      |

**Table S6.** Perturbed Pathways of Cohort 3 RAD D1vD5

| <b>Enriched Pathways</b>                                           | <b>FC</b> | <b>p-value</b> | <b>FDR</b> |
|--------------------------------------------------------------------|-----------|----------------|------------|
| Lactose Degradation                                                | 0.444     | 0.000          | 0.006      |
| Glucose-Alanine Cycle                                              | 0.308     | 0.001          | 0.010      |
| Transfer of Acetyl Groups into Mitochondria                        | 0.273     | 0.000          | 0.004      |
| Nucleotide Sugars Metabolism                                       | 0.250     | 0.000          | 0.010      |
| Thiamine Metabolism                                                | 0.222     | 0.033          | 0.080      |
| De Novo Triacylglycerol Biosynthesis                               | 0.222     | 0.033          | 0.080      |
| Mitochondrial Electron Transport Chain                             | 0.211     | 0.003          | 0.016      |
| Ethanol Degradation                                                | 0.211     | 0.003          | 0.016      |
| Glycerolipid Metabolism                                            | 0.200     | 0.001          | 0.010      |
| Glycolysis                                                         | 0.200     | 0.001          | 0.010      |
| Threonine and 2-Oxobutanoate Degradation                           | 0.200     | 0.003          | 0.017      |
| Malate-Aspartate Shuttle                                           | 0.200     | 0.041          | 0.094      |
| Phytanic Acid Peroxisomal Oxidation                                | 0.192     | 0.001          | 0.010      |
| Betaine Metabolism                                                 | 0.190     | 0.004          | 0.020      |
| Fructose and Mannose Degradation                                   | 0.188     | 0.000          | 0.010      |
| Glycerol Phosphate Shuttle                                         | 0.182     | 0.049          | 0.094      |
| Trehalose Degradation                                              | 0.182     | 0.049          | 0.094      |
| Cardiolipin Biosynthesis                                           | 0.182     | 0.049          | 0.094      |
| Beta Oxidation of Very Long Chain Fatty Acids                      | 0.176     | 0.017          | 0.050      |
| Folate Metabolism                                                  | 0.172     | 0.002          | 0.014      |
| Gluconeogenesis                                                    | 0.171     | 0.001          | 0.010      |
| Phosphatidylethanolamine Biosynthesis                              | 0.167     | 0.057          | 0.100      |
| Nicotinate and Nicotinamide Metabolism                             | 0.162     | 0.001          | 0.010      |
| Galactose Metabolism                                               | 0.158     | 0.001          | 0.010      |
| Butyrate Metabolism                                                | 0.158     | 0.023          | 0.063      |
| Citric Acid Cycle                                                  | 0.156     | 0.003          | 0.017      |
| Cysteine Metabolism                                                | 0.154     | 0.009          | 0.035      |
| Ketone Body Metabolism                                             | 0.154     | 0.066          | 0.108      |
| Lactose Synthesis                                                  | 0.150     | 0.026          | 0.069      |
| Mitochondrial Beta-Oxidation of Short Chain Saturated Fatty Acids  | 0.148     | 0.010          | 0.039      |
| Pyruvate Metabolism                                                | 0.146     | 0.001          | 0.010      |
| Mitochondrial Beta-Oxidation of Long Chain Saturated Fatty Acids   | 0.143     | 0.012          | 0.040      |
| Glutathione Metabolism                                             | 0.143     | 0.030          | 0.076      |
| Phosphatidylcholine Biosynthesis                                   | 0.143     | 0.076          | 0.118      |
| Histidine Metabolism                                               | 0.140     | 0.002          | 0.014      |
| Pterine Biosynthesis                                               | 0.138     | 0.013          | 0.042      |
| Urea Cycle                                                         | 0.138     | 0.013          | 0.042      |
| Carnitine Synthesis                                                | 0.136     | 0.034          | 0.080      |
| Starch and Sucrose Metabolism                                      | 0.129     | 0.017          | 0.050      |
| Sphingolipid Metabolism                                            | 0.125     | 0.009          | 0.035      |
| Ammonia Recycling                                                  | 0.125     | 0.019          | 0.054      |
| Androstenedione Metabolism                                         | 0.125     | 0.042          | 0.094      |
| Estrone Metabolism                                                 | 0.125     | 0.042          | 0.094      |
| Biotin Metabolism                                                  | 0.125     | 0.237          | 0.302      |
| Glutamate Metabolism                                               | 0.122     | 0.004          | 0.020      |
| Warburg Effect                                                     | 0.121     | 0.002          | 0.014      |
| Beta-Alanine Metabolism                                            | 0.118     | 0.023          | 0.063      |
| Alanine Metabolism                                                 | 0.118     | 0.107          | 0.151      |
| Phosphatidylinositol Phosphate Metabolism                          | 0.118     | 0.107          | 0.151      |
| Oxidation of Branched Chain Fatty Acids                            | 0.115     | 0.052          | 0.094      |
| Inositol Phosphate Metabolism                                      | 0.115     | 0.052          | 0.094      |
| Plasmalogen Synthesis                                              | 0.115     | 0.052          | 0.094      |
| Arginine and Proline Metabolism                                    | 0.113     | 0.006          | 0.028      |
| Mitochondrial Beta-Oxidation of Medium Chain Saturated Fatty Acids | 0.111     | 0.057          | 0.100      |
| Phenylacetate Metabolism                                           | 0.111     | 0.263          | 0.326      |
| Phenylalanine and Tyrosine Metabolism                              | 0.107     | 0.062          | 0.103      |
| Selenoamino Acid Metabolism                                        | 0.107     | 0.062          | 0.103      |
| Pentose Phosphate Pathway                                          | 0.103     | 0.068          | 0.109      |
| Glycine and Serine Metabolism                                      | 0.102     | 0.011          | 0.039      |
| Tryptophan Metabolism                                              | 0.100     | 0.012          | 0.040      |

|                                            |       |       |       |
|--------------------------------------------|-------|-------|-------|
| Lysine Degradation                         | 0.100 | 0.074 | 0.116 |
| Riboflavin Metabolism                      | 0.100 | 0.140 | 0.193 |
| Propanoate Metabolism                      | 0.095 | 0.046 | 0.094 |
| Pantothenate and CoA Biosynthesis          | 0.095 | 0.152 | 0.207 |
| Purine Metabolism                          | 0.095 | 0.009 | 0.035 |
| Methionine Metabolism                      | 0.093 | 0.050 | 0.094 |
| Fatty acid Metabolism                      | 0.093 | 0.050 | 0.094 |
| Inositol Metabolism                        | 0.091 | 0.093 | 0.137 |
| Amino Sugar Metabolism                     | 0.091 | 0.093 | 0.137 |
| Androgen and Estrogen Metabolism           | 0.091 | 0.093 | 0.137 |
| Sulfate/Sulfite Metabolism                 | 0.091 | 0.164 | 0.220 |
| Degradation of Superoxides                 | 0.091 | 0.312 | 0.377 |
| Fatty Acid Elongation In Mitochondria      | 0.086 | 0.106 | 0.151 |
| Valine, Leucine and Isoleucine Degradation | 0.083 | 0.044 | 0.094 |
| Caffeine Metabolism                        | 0.083 | 0.188 | 0.245 |
| Retinol Metabolism                         | 0.081 | 0.121 | 0.169 |
| Bile Acid Biosynthesis                     | 0.077 | 0.059 | 0.101 |
| Vitamin K Metabolism                       | 0.071 | 0.379 | 0.447 |
| Steroidogenesis                            | 0.070 | 0.168 | 0.222 |
| Phospholipid Biosynthesis                  | 0.069 | 0.250 | 0.314 |
| Steroid Biosynthesis                       | 0.063 | 0.210 | 0.271 |
| Aspartate Metabolism                       | 0.057 | 0.325 | 0.389 |
| Spermidine and Spermine Biosynthesis       | 0.056 | 0.458 | 0.522 |
| Pyrimidine Metabolism                      | 0.051 | 0.311 | 0.377 |
| Porphyrin Metabolism                       | 0.050 | 0.387 | 0.452 |
| Ubiquinone Biosynthesis                    | 0.050 | 0.494 | 0.557 |
| Tyrosine Metabolism                        | 0.042 | 0.433 | 0.499 |
| Arachidonic Acid Metabolism                | 0.014 | 0.910 | 1.000 |

**Table S7.** Perturbed Metabolites of Cohort 3 RAD+200 D5vD9

| Metabolite ID                                       | VIP   | Pcorr  | FC     | t-score | p-value | FDR   |
|-----------------------------------------------------|-------|--------|--------|---------|---------|-------|
| 1-Pyrroline-5-carboxylic acid                       | 1.929 | -0.062 | -0.665 | -3.239  | 0.004   | 0.058 |
| 2,6-Diamino-4-hydroxy-5-N-methylformamidopyrimidine | 2.086 | 0.890  | 0.556  | 3.389   | 0.003   | 0.050 |
| 2-Ketobutyric acid                                  | 1.745 | 0.825  | 0.470  | 2.904   | 0.008   | 0.092 |
| 3-Nitrotyrosine                                     | 1.998 | 0.853  | 0.660  | 3.412   | 0.002   | 0.048 |
| 4,6-Dideoxy-4-oxo-dTDP-D-glucose                    | 1.853 | 0.846  | 0.622  | 3.120   | 0.005   | 0.068 |
| 8-Hydroxyguanine                                    | 1.218 | 0.336  | 0.651  | 2.261   | 0.034   | 0.188 |
| 8-Hydroxypurine                                     | 1.292 | 0.812  | 0.363  | 2.237   | 0.035   | 0.192 |
| Acetamide                                           | 1.493 | -0.499 | -0.018 | -2.199  | 0.038   | 0.196 |
| ADP-ribose 1"-2" cyclic phosphate                   | 1.625 | 0.838  | 0.557  | 2.581   | 0.017   | 0.130 |
| Anserine                                            | 1.927 | -0.856 | -0.033 | -3.310  | 0.003   | 0.036 |
| Arginyl-Tyrosine                                    | 1.941 | 0.425  | 0.566  | 2.098   | 0.047   | 0.216 |
| Asparaginyl-Proline                                 | 1.647 | 0.853  | 0.576  | 2.880   | 0.009   | 0.095 |
| Chondroitin 4-sulfate                               | 1.459 | 0.691  | 0.402  | 2.217   | 0.037   | 0.195 |
| Creatinine                                          | 1.602 | 0.091  | -0.794 | -2.770  | 0.011   | 0.106 |
| Deoxyuridine                                        | 1.848 | 0.522  | 0.484  | 2.863   | 0.009   | 0.097 |
| D-Galactose                                         | 1.551 | 0.734  | 0.159  | 2.479   | 0.021   | 0.123 |
| D-Glucose                                           | 2.005 | 0.864  | 0.326  | 3.570   | 0.002   | 0.036 |
| D-Glutamic acid                                     | 1.839 | 0.865  | 0.618  | 2.967   | 0.007   | 0.085 |
| dGTP                                                | 1.353 | 0.738  | 0.636  | 2.508   | 0.020   | 0.143 |
| DL-Glutamate                                        | 1.601 | 0.686  | 0.405  | 2.273   | 0.033   | 0.186 |
| dTDP                                                | 1.548 | 0.667  | 0.522  | 2.544   | 0.018   | 0.136 |
| Glycyl-glycine                                      | 1.882 | 0.837  | 0.722  | 3.109   | 0.005   | 0.069 |
| Glycyl-Threonine                                    | 1.432 | 0.650  | 0.371  | 2.109   | 0.046   | 0.214 |
| L-Alanine                                           | 1.628 | 0.284  | 0.118  | 2.791   | 0.010   | 0.069 |
| L-Carnitine                                         | 1.664 | 0.769  | 0.474  | 2.745   | 0.012   | 0.108 |
| L-Glutamic acid                                     | 1.716 | 0.618  | 0.477  | 2.529   | 0.019   | 0.139 |
| L-Glutamine                                         | 2.509 | -0.719 | -0.031 | -4.792  | 0.000   | 0.016 |
| L-Lysine                                            | 1.552 | 0.744  | 0.395  | 2.404   | 0.025   | 0.163 |
| L-Lysine                                            | 1.828 | 0.391  | 0.135  | 3.253   | 0.004   | 0.036 |
| L-Phenylalanine                                     | 2.178 | 0.756  | 0.649  | 3.709   | 0.001   | 0.031 |
| L-Phenylalanine                                     | 2.236 | -0.724 | -0.045 | -4.313  | 0.000   | 0.026 |
| L-saccharopinate(1-)                                | 1.806 | 0.828  | 0.462  | 3.017   | 0.006   | 0.080 |
| L-Thyronine                                         | 1.507 | 0.707  | 0.466  | 2.702   | 0.013   | 0.112 |
| L-Tryptophan                                        | 2.491 | -0.875 | -0.022 | -4.066  | 0.000   | 0.033 |
| L-Tyrosine                                          | 1.933 | -0.812 | -0.028 | -3.216  | 0.004   | 0.036 |
| Malyl-CoA                                           | 1.149 | 0.797  | 0.580  | 2.196   | 0.039   | 0.199 |
| N-Acetyl-D-glucosamine                              | 1.616 | 0.698  | 0.520  | 2.676   | 0.014   | 0.116 |
| N-Acetyl-glucosamine 1-phosphate                    | 1.269 | 0.531  | 0.880  | 2.363   | 0.027   | 0.169 |
| NAD+                                                | 1.755 | 0.461  | 0.040  | 2.947   | 0.007   | 0.060 |
| NADH                                                | 1.770 | -0.719 | -0.025 | -2.810  | 0.010   | 0.069 |
| NADP+                                               | 1.733 | 0.401  | 0.039  | 2.887   | 0.008   | 0.066 |
| N-Decanoylglycine                                   | 1.388 | 0.587  | 0.466  | 2.175   | 0.040   | 0.202 |
| N-Lauroylglycine                                    | 2.069 | 0.546  | 0.853  | 3.503   | 0.002   | 0.041 |
| o-Tyrosine                                          | 1.953 | -0.185 | -1.154 | -3.642  | 0.001   | 0.034 |
| Oxidized glutathione                                | 1.805 | 0.774  | 0.570  | 2.763   | 0.011   | 0.107 |
| Phosphoribosyl-AMP                                  | 1.631 | 0.837  | 0.530  | 2.657   | 0.014   | 0.119 |
| Prolyl-Alanine                                      | 1.386 | 0.627  | 0.327  | 2.230   | 0.036   | 0.193 |
| Prolyl-Asparagine                                   | 2.082 | -0.003 | -0.759 | -3.708  | 0.001   | 0.031 |
| Purine                                              | 2.126 | 0.830  | 0.545  | 3.488   | 0.002   | 0.043 |
| Tiglylcarnitine                                     | 1.657 | 0.582  | 0.609  | 2.206   | 0.038   | 0.197 |
| Uracil                                              | 2.050 | 0.824  | 0.666  | 3.549   | 0.002   | 0.039 |
| Xanthurenate                                        | 2.024 | -0.846 | -0.026 | -3.387  | 0.003   | 0.036 |

**Table S8.** Perturbed Pathways of Cohort 3 RAD+200 D5vD9

| <b>Enriched Pathways</b>                                           | <b>FC</b> | <b>p-value</b> | <b>FDR</b> |
|--------------------------------------------------------------------|-----------|----------------|------------|
| Glucose-Alanine Cycle                                              | 0.462     | 0.000          | 0.000      |
| Malate-Aspartate Shuttle                                           | 0.300     | 0.006          | 0.094      |
| Lactose Degradation                                                | 0.222     | 0.047          | 0.220      |
| De Novo Triacylglycerol Biosynthesis                               | 0.222     | 0.047          | 0.220      |
| Glutathione Metabolism                                             | 0.190     | 0.008          | 0.094      |
| Carnitine Synthesis                                                | 0.182     | 0.010          | 0.094      |
| Transfer of Acetyl Groups into Mitochondria                        | 0.182     | 0.010          | 0.094      |
| Glycerol Phosphate Shuttle                                         | 0.182     | 0.068          | 0.224      |
| Cardiolipin Biosynthesis                                           | 0.182     | 0.068          | 0.224      |
| Beta-Alanine Metabolism                                            | 0.176     | 0.002          | 0.054      |
| Urea Cycle                                                         | 0.172     | 0.005          | 0.094      |
| Lysine Degradation                                                 | 0.167     | 0.005          | 0.094      |
| Glutamate Metabolism                                               | 0.163     | 0.000          | 0.022      |
| Ethanol Degradation                                                | 0.158     | 0.037          | 0.218      |
| Ketone Body Metabolism                                             | 0.154     | 0.092          | 0.233      |
| Nucleotide Sugars Metabolism                                       | 0.150     | 0.042          | 0.218      |
| Threonine and 2-Oxobutanoate Degradation                           | 0.150     | 0.042          | 0.218      |
| Folate Metabolism                                                  | 0.138     | 0.025          | 0.178      |
| Nicotinate and Nicotinamide Metabolism                             | 0.135     | 0.014          | 0.121      |
| Ammonia Recycling                                                  | 0.125     | 0.035          | 0.218      |
| Androstenedione Metabolism                                         | 0.125     | 0.067          | 0.224      |
| Estrone Metabolism                                                 | 0.125     | 0.067          | 0.224      |
| Biotin Metabolism                                                  | 0.125     | 0.280          | 0.473      |
| Amino Sugar Metabolism                                             | 0.121     | 0.039          | 0.218      |
| Glycerolipid Metabolism                                            | 0.120     | 0.074          | 0.224      |
| Glycolysis                                                         | 0.120     | 0.074          | 0.224      |
| Alanine Metabolism                                                 | 0.118     | 0.146          | 0.317      |
| Tryptophan Metabolism                                              | 0.117     | 0.008          | 0.094      |
| Histidine Metabolism                                               | 0.116     | 0.025          | 0.178      |
| Cysteine Metabolism                                                | 0.115     | 0.082          | 0.224      |
| Phytanic Acid Peroxisomal Oxidation                                | 0.115     | 0.082          | 0.224      |
| Plasmalogen Synthesis                                              | 0.115     | 0.082          | 0.224      |
| Mitochondrial Beta-Oxidation of Short Chain Saturated Fatty Acids  | 0.111     | 0.090          | 0.233      |
| Phenylacetate Metabolism                                           | 0.111     | 0.309          | 0.488      |
| Homocysteine Degradation                                           | 0.111     | 0.309          | 0.488      |
| Phenylalanine and Tyrosine Metabolism                              | 0.107     | 0.098          | 0.233      |
| Selenoamino Acid Metabolism                                        | 0.107     | 0.098          | 0.233      |
| Mitochondrial Beta-Oxidation of Long Chain Saturated Fatty Acids   | 0.107     | 0.098          | 0.233      |
| Galactose Metabolism                                               | 0.105     | 0.061          | 0.224      |
| Butyrate Metabolism                                                | 0.105     | 0.174          | 0.342      |
| Mitochondrial Electron Transport Chain                             | 0.105     | 0.174          | 0.342      |
| Warburg Effect                                                     | 0.103     | 0.024          | 0.178      |
| Pterine Biosynthesis                                               | 0.103     | 0.106          | 0.247      |
| Propanoate Metabolism                                              | 0.095     | 0.082          | 0.224      |
| Betaine Metabolism                                                 | 0.095     | 0.204          | 0.384      |
| Arginine and Proline Metabolism                                    | 0.094     | 0.056          | 0.224      |
| Fructose and Mannose Degradation                                   | 0.094     | 0.132          | 0.302      |
| Androgen and Estrogen Metabolism                                   | 0.091     | 0.142          | 0.316      |
| Degradation of Superoxides                                         | 0.091     | 0.363          | 0.548      |
| Fatty Acid Elongation In Mitochondria                              | 0.086     | 0.161          | 0.329      |
| Gluconeogenesis                                                    | 0.086     | 0.161          | 0.329      |
| Glycine and Serine Metabolism                                      | 0.085     | 0.081          | 0.224      |
| Pyrimidine Metabolism                                              | 0.085     | 0.081          | 0.224      |
| Caffeine Metabolism                                                | 0.083     | 0.249          | 0.428      |
| Purine Metabolism                                                  | 0.081     | 0.069          | 0.224      |
| Retinol Metabolism                                                 | 0.081     | 0.181          | 0.348      |
| Thyroid hormone synthesis                                          | 0.077     | 0.414          | 0.597      |
| Sphingolipid Metabolism                                            | 0.075     | 0.213          | 0.393      |
| Mitochondrial Beta-Oxidation of Medium Chain Saturated Fatty Acids | 0.074     | 0.295          | 0.488      |
| Vitamin K Metabolism                                               | 0.071     | 0.438          | 0.613      |

|                                               |       |       |       |
|-----------------------------------------------|-------|-------|-------|
| Methionine Metabolism                         | 0.070 | 0.245 | 0.428 |
| Fatty acid Metabolism                         | 0.070 | 0.245 | 0.428 |
| Steroidogenesis                               | 0.070 | 0.245 | 0.428 |
| Tyrosine Metabolism                           | 0.069 | 0.155 | 0.329 |
| Phospholipid Biosynthesis                     | 0.069 | 0.325 | 0.506 |
| Starch and Sucrose Metabolism                 | 0.065 | 0.355 | 0.544 |
| Pyruvate Metabolism                           | 0.063 | 0.301 | 0.488 |
| Citric Acid Cycle                             | 0.063 | 0.370 | 0.549 |
| Beta Oxidation of Very Long Chain Fatty Acids | 0.059 | 0.504 | 0.676 |
| Aspartate Metabolism                          | 0.057 | 0.414 | 0.597 |
| Valine, Leucine and Isoleucine Degradation    | 0.050 | 0.436 | 0.613 |
| Porphyrin Metabolism                          | 0.050 | 0.483 | 0.667 |
| Catecholamine Biosynthesis                    | 0.050 | 0.562 | 0.715 |
| Ubiquinone Biosynthesis                       | 0.050 | 0.562 | 0.715 |
| Lactose Synthesis                             | 0.050 | 0.562 | 0.715 |
| Bile Acid Biosynthesis                        | 0.046 | 0.490 | 0.667 |
| Sulfate/Sulfite Metabolism                    | 0.045 | 0.597 | 0.750 |
| Arachidonic Acid Metabolism                   | 0.043 | 0.532 | 0.704 |
| Oxidation of Branched Chain Fatty Acids       | 0.038 | 0.659 | 0.807 |
| Inositol Phosphate Metabolism                 | 0.038 | 0.659 | 0.807 |
| Pentose Phosphate Pathway                     | 0.034 | 0.699 | 0.846 |
| Inositol Metabolism                           | 0.030 | 0.746 | 0.892 |
| Steroid Biosynthesis                          | 0.021 | 0.866 | 1.000 |
